# Supplementary material
Source: ML conference proceedings conference paper supplement (https://openaccess.thecvf.com/content/WACV2025/html/Sohaib_Multi-Aperture_Transformers_for_WACV_2025_paper.html)
Supplement: Supplementary file 1 [file Sohaib_Multi-Aperture_Transformers_for_WACV_2025_supplemental.pdf]

| Cell line    | MCF10A                                                                              | MDA-MB-231                                                                          | MDA-MB-468                                                                           | MCF7                                                                                  |
|--------------|-------------------------------------------------------------------------------------|-------------------------------------------------------------------------------------|--------------------------------------------------------------------------------------|---------------------------------------------------------------------------------------|
| Day 2        | 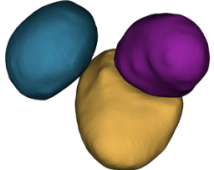   |    |    |    |
| No. of cells | 3/3                                                                                 | 3/3                                                                                 | 5/5                                                                                  | 5/5                                                                                   |
| Day 5        |   |   |   |   |
| No. of cells | 8/8                                                                                 | 11/12                                                                               | 17/20                                                                                | 19/22                                                                                 |
| Day 7        |  |  |  |  |
| No. of cells | 45/47                                                                               | 19/21                                                                               | 89/95                                                                                | 43/48                                                                                 |

Figure 1: (Supplementary) The performance of MAT3D for colony organization of multiple cell lines is shown as a function of the fixation time. Each nucleus is color-coded, and the predicted number of cells per colony is shown against the ground truth.

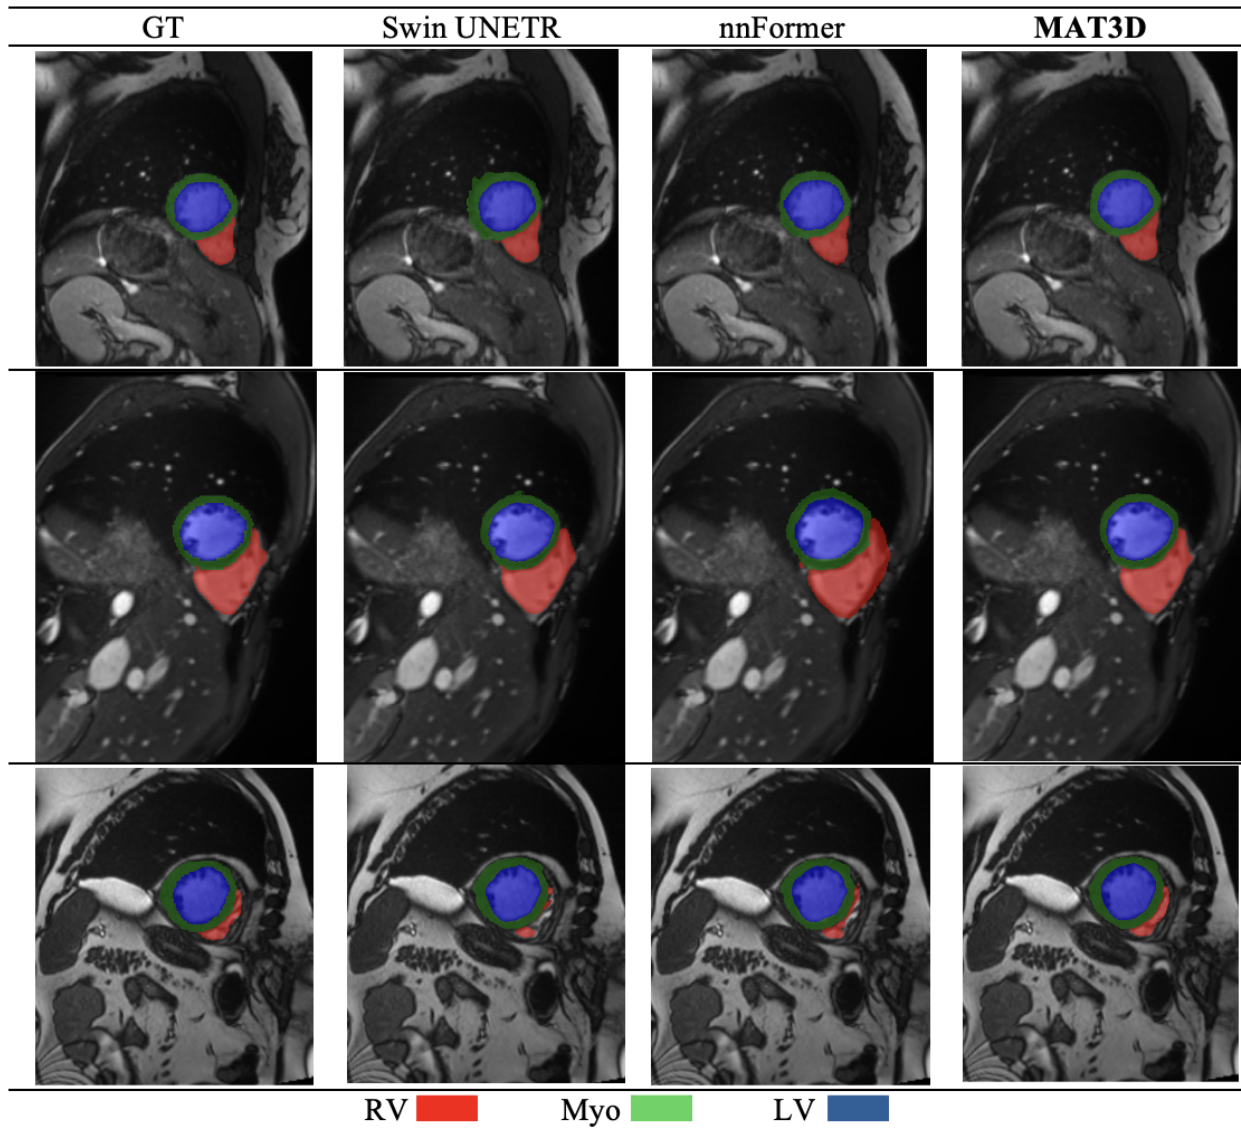

Figure 2: (Supplementary) Visualization of segmentation results on ACDC dataset. MAT3D is compared against the ground truth (GT) and the current state-of-the-art nnFormer and Swin UNETR.
